# Supplementary material for: The influence of biological and lifestyle factors on circulating cell-free DNA in blood plasma
Source: eLife. 2021 Nov 9;10:e69679. doi: 10.7554/eLife.69679 (PMC8577835; doi:10.7554/eLife.69679)
Supplement: Supplementary file 1. [file elife-69679-supp1.xlsx]

## Sheet: 1.1. BMI
First author	Year	Blood tube type (plasma volume extracted)	Extraction kit	Quantification method	Participants		BMI	Quantification	Conclusion on cirDNA amount
Beiter	2011	EDTA (400 µL)	QIAamp Blood Mini Kit (QIAGEN)	qPCR	53 Recreational runners (34 M + 19 F)		-	-	No effect
Jylhava	2012	EDTA	Direct from plasma	Qubit	258 Nonagenarians (62 M + 196 F)		-	P = 0.258	No effect
Jylhava	2013	EDTA	Direct from plasma	Qubit	144 Nonagenarians (43 M + 101 F)		-	P = 0.764	No effect
Kim	2014	DNS (1.5 mL)	QIAamp DNA Micro kit (QIAGEN)	qPCR	34 Healthy control (15 M + 19 F)		< 23 (n = 20)	75.9 ± 7.4 ng/mL	No effect
							≥ 23 (n = 14)	80.14 ± 8.12 ng/mL
					30 Gastric cancer patients (23 M + 7 F)		< 23 (n = 19)	114.00 ± 12.86 ng/mL	No effect
							≥ 23 (n = 11)	109.00 ± 14.41 ng/mL
Jylhava	2014	DNS	DNS	Qubit	Women (n = 366-409)		Av: 27.31	r = 0.105. P = 0.035	Significantly higher with higher BMI
					Women (Estrogen HRT user, n = 131-148)		Av: 27	r = 0.141. P = 0.089	No effect
					Women (Estrogen + Progestin HRT user, n = 87-98)		Av: 26.77	r = 0.148. P = 0.145	No effect
					Men (n = 609-681)		Av: 27.50	r = -0.029. P = 0.452	No effect
Karlas	2017	EDTA (0.2 mL)	QIAamp Blood DNA Mini Kit (QIAGEN)	qPCR	58 Non-alcoholic fatty liver disease patients		< 25 (n = 12)	-	No effect
							25 – 30 (n = 30)
							30 – 35 (n = 15)
							> 35 (n = 1)
Yan	2018	EDTA (1 mL)	MagMAX Cell-free DNA Isolation Kit (ThermoFisher)	Qubit	62 Hepatitis B virus-related liver fibrosis patients (46 M + 16 F)		< 24 (n = 42)	~12.5 ng/mL*	Significantly higher with higher BMI
							≥ 24 (n = 19)	~22.5 ng/mL*
Bryk	2019	DNS	DNS	Assay kit (Invitrogen)	113 T2D patients	Low cirDNA (<2.84 ug/mL) (n = 83)		P = 0.61	No effect
						High cirDNA (≥2.84 ug/mL) (n = 28)
M: Male
F: Female
HRT: Hormone Replacement Therapy
T2D: Type II Diabetes
DNS: Did not specify
* Values extrapolated from graph

## Sheet: 1.2. Menstruation
First author	Year	Blood tube type (plasma volume extracted)	Extraction kit	Quantification method	Participants	Quantification		Conclusion on cirDNA amount
Yuwono	2021	EDTA (5 mL)	QIAamp Circulating Nucleic Acid kit (QIAGEN)	qPCR	40 (matched samples)	NM	1.79 ± 0.96 ng/mL plasma	No effect
						M	1.68 ± 0.88 ng/mL plasma

## Sheet: 1.3. Hypertension
First author	Year	Blood tube type (plasma volume extracted)	Extraction kit	Quantification method	Participants		Hypertension parameters	Quantification	Conclusion on cirDNA amount
Jylhava	2012	EDTA	Direct from plasma	Qubit	258 Nonagenarians (62 M + 196 F)		SBP	P = 0.961	No effect
							DBP	P = 0.500
Jylhava	2014	DNS	DNS	Qubit	Women (n = 366-409)		SBP	P = < 0.001	Significantly correlated with SBP, DBP and PP
							DBP	P = 0.005
							PP	P = < 0.001
					Women (Estrogen HRT user, n = 131-148)		SBP	P = 0.723	No effect
							DBP	P = 0.776
							PP	P = 0.746
					Women (Estrogen + Progestin HRT user, n = 87-98)		SBP	P = 0.360	No effect
							DBP	P = 0.416
							PP	P = 0.438
					Men (n = 609-681)		SBP	P = 0.013	Significantly correlated with SBP and PP but not DBP
							DBP	P = 0.227
							PP	P = 0.005
Jeong	2015	DNS (1 mL)	QIAamp Circulating Nucleic Acid Kit (QIAGEN)	qPCR	95 Haemodialysis patients		SBP	P = < 0.001	Significantly higher cirDNA in patients with high SBP
							SBP (multivariate)	P = 0.001
					Diabetic haemodialysis patients (n = 50/95)		SBP	P = 0.12
							SBP (multivariate)	P = 0.02
Brodbeck	2020	EDTA (0.5 mL)	Circulating DNA Purification Mini Kit (Norgen)	qPCR	14 Healthy women		SBP		No effect
							DBP
							Pulse
Bryk	2019	DNS	DNS	Assay kit (Invitrogen)	113 T2D patients	Low cirDNA (<2.84 ug/mL) (n = 83)	Arterial hypertension	0.68	No effect
						High cirDNA (≥2.84 ug/mL) (n = 28)
SBP: Systolic blood pressure
DBP: Diastolic blood pressure
HRT: Hormone Replacement Therapy
T2D: Type II Diabetes
DNS: Did not specify
M: Male
F: Female
PP: pulse pressure

## Sheet: 1.4. Circadian rhythm
First author	Year	Blood tube type (plasma volume extracted)	Extraction kit	Quantification method	Participants	Quantification			Conclusion on cirDNA amount
Fatouros	2010	DNS (400 µL)	QIAamp DNA Blood Mini Kit (QIAGEN)	qPCR	11 moderately trained men	0 hours		~150-200 GenEq/mL	No effect
						30 minutes
						1 hour
						2 hours
						3 hours
						4 hours
						5 hours
						6 hours
						8 hours
						10 hours
						24 hours		~100 GenEq/mL
Korabecna	2011	EDTA or heparin	QIAamp DNA blood kit (QIAGEN)	qPCR (GAPDH)	11 healthy subjects	7:00 - 12:00		↑ cirDNA in 7/11 subjects	No effect
								↓ cirDNA 4/11 subjects
						12:00 - 17:00		↑ cirDNA in 4/11 subjects
								↔ cirDNA in 5/11 subjects
								↓ cirDNA 2/11 subjects
Toth	2017	EDTA (3.5 mL)	High Pure Viral Nucleic Acid Large Volume Kit (Roche)	Qubit	1 healthy subject	00:00:00		16.18	No effect
						06:00:00		13.74
						12:00:00		13.36
						18:00:00		13.89
					1 adenoma	00:00:00		13.16
						06:00:00		12.86
						12:00:00		14.22
						18:00:00		13.76
					2 Stage I CRC patients	00:00:00		11.3 ± 1.88
						06:00:00		11.14 ± 0.76
						12:00:00		13.75 ± 0.9
						18:00:00		10.76 ± 1.01
					3 Stage II CRC patients	00:00:00		20.0 ± 8.1
						06:00:00		40.39 ± 28.05
						12:00:00		29.42 ± 14.54
						18:00:00		25.46 ± 10.69
					1 Stage III CRC patients	00:00:00		17.93
						06:00:00		34.84
						12:00:00		21.23
						18:00:00		17.98
					3 Stage IV CRC patients	00:00:00		78.65 ± 88.66
						06:00:00		48.06 ± 41.8
						12:00:00		45.92 ±55.74
						18:00:00		50.76 ± 63.95
Madsen	2019	EDTA (4 mL)	QIAamp Circulating Nucleic Acid Kit (QIAGEN)	ddPCR (Biorad; 4 genes)	Healthy subjects (n = 13 - 33)	Day 1	09:00:00	1589.82	Significantly decreasing throughout the day (for EIF2C1 gene). No effect between days
						Day 2	09:00:00	1404.82
							12 noon	1524.45
							15:00:00	1314.36
							18:00:00	1446.1
							21:00:00	1052.96
						Day 3	09:00:00	1433.51
					10 lung cancer (4 M + 6 F)	Day 1	Hour 0 & 1	-	No effect between days and within an hour.
						Day 2	Hour 0 & 1
						Day 3	Hour 0 & 1
Wagner	2020	EDTA (1 mL)	QIAamp Circulating Nucleic Acid Kit (QIAGEN)	Qubit, ddPCR	4 healthy individuals (1 M + 3 F) age 42.5-73.7	Day 0	Every 2h 45 min: 8.30 AM - 7.30 PM		No effect
						Day 7
Brodbeck	2020	EDTA (0.5 mL)	Circulating DNA Purification Mini Kit (Norgen)	qPCR	14 healthy women	0, 5, 10, 15, 20, 30, 40, 45, 60, 75 minutes			No effect
Meddeb	2019	EDTA (0.2-1 mL)	QIAamp Blood Mini Kit (QIAGEN)	qPCR	4 healthy individuals (2 M + 2 F)	09:00:00		1500 copies/mL	Highest level in the morning
						12:00:00		480 copies/mL
						15:00:00		715 copies/mL
						18:00:00		709 copies/mL
		Streck (0.2 - 1 mL)				09:00:00		874 copies/mL	Highest level in the morning
						12:00:00		562 copies/mL
						15:00:00		728 copies/mL
						18:00:00		313 copies/mL
ddPCR: droplet digital polymerase chain reaction
CRC: Colorectal cancer
GenEq = Genome equivalent
DNS: Did not specify
M: Male
F: Female
*Numbers represent log cirDNA

## Sheet: 1.5. Psychological stress
First author	Year	Blood tube type (plasma volume extracted)	Extraction kit	Quantification method	Participants	Stress type	Condition	Quantification		Conclusion on cirDNA amount
Hummel	2018	EDTA (0.9 mL)	QIAamp Circulating Nucleic Acid Kit (QIAGEN)	qPCR	20 healthy male sport science students	Acute lab-induced psychological stress	Before TSST test	~8900 copies/mL		Significantly higher after TSST test
							After TSST test	>16,200 copies/mL
Czamanski-Cohen	2014	DNS (10 µL)	Direct from plasma	SYBR Gold Nucleic Acid Gel Stain	14 nulliparous women undergoing IVF treatment with cirDNA > 600 ng/mL	Stress due to IVF treatment	Control (normal stress reduction from nurse) (n = 6)	Start of IVF cycle	829 ng/mL	Significantly lower in intervened group by the end of cycle
								Ovum retrieval	720 ng/mL
								End of IVF cycle	756 ng/mL
							Intervention group (with experienced psychotherapist) (n = 8)	Start of IVF cycle	777 ng/mL
								Ovum retrieval	625 ng/mL
								End of IVF cycle	558 ng/mL
Brodbeck	2020	EDTA (0.5 mL)	Circulating DNA Purification Mini Kit (Norgen)	qPCR	14 healthy women	Blood draw nervousness (scale 0 (relaxed) - 10 (nervous))	-	-		No effect
DNS: Did not specify

## Sheet: 1.6. Biological sex
First author	Year	Blood tube type (plasma volume extracted)	Extraction kit	Quantification method	Participants		Quantification			Conclusion on cirDNA amount
Coulet	2000	EDTA	QIAmp Blood Kit (QIAGEN)	DyNA Quant 200 fluorimeter	117 head and neck squamous cell carcinoma patients		<100 ng/mL (n = 76)	100 ng/mL (n = 31)	>250 ng/mL (n = 10)	No effect
						Male (n = 105)	69	28	8
						Female (n = 12)	7	3	2
Sozzi	2001	Lithium-heparin	Direct from plasma	DNA DipStick TM Kit	43 controls	Male	-			No effect
						Female
					84 lung cancer patients	Male (n = 72)	334 ng/mL			No effect (P = 0.403)
						Female (n = 12)	222 ng/mL
Tamkovich	2004	EDTA (1 mL)	Tamkovich et al (2004)	SYBR Green II dye	15 males		16 ng/mL			No effect
					20 females		15 ng/mL
Zhong	2007	EDTA (400 µL)	MagNA Pure LC DNA Isolation Kit-Large Volume (Roche)	qPCR	54 healthy adults	Male (n = 27)	1,117.5 copies/mL			No effect
						Female (n = 27)	1,136 copies/mL
Lee	2011	EDTA (200 µL)	QIAamp DNA Blood Mini Kit (QIAGEN)	qPCR	134 lung cancer patients	Male (n = 13)	4.93 ng/mL			No effect (P = 0.947)
						Female (n = 121)	4.91 ng/mL
Beiter	2011	EDTA (400 µL)	QIAamp Blood Mini Kit (QIAGEN)	qPCR	53 recreational runners	Male (n = 34)	-			No effect
						Female (n = 19)
Jylhava	2012	EDTA	Direct from plasma	Qubit	258 nonagenarians	Male (n = 62)	0.729 (0.679-0.827) ug/mL			Significantly higher in male (P = 0.018)
						Female (n = 196)	0.699 (0637-0.795) ug/mL
Kim	2014	DNS (1.5 mL)	QIAamp DNA Micro kit (QIAGEN)	qPCR	34 controls	Male (n = 15)	79.71 ± 6.85 ng/mL			No effect (P = 0.598)
						Female (n = 19)	78.13 ± 9.11 ng/mL
					30 gastric cancer patients	Male (n = 23)	110 ± 14.13 ng/mL			Significantly higher in female (P = 0.01)
						Female (n = 7)	119.29 ± 7.88 ng/mL
Spindler	2014	EDTA (1 mL)	QIAsymphony virus/bacteria Midi Kit (QIAGEN)	qPCR	86 metastatic colorectal cancer patients	Male (n = 55)	8,900 (1400-1,200,000) alleles/mL			No effect (P = 0.24)
						Female (n = 31)	4,300 (1,500-99,000) alleles/mL
Jylhava	2014	DNS	DNS	Qubit	Male (n = 609-681)		0.88 (0.82-0.99) ug/mL			Singificantly higher in male (P = 0.00)
					Female (n = 366-409)		0.83 (0.77-0.90) ug/mL
Jeong	2015	DNS (1 mL)	QIAamp Circulating Nucleic Acid Kit (QIAGEN)	qPCR	95 haemodialysis patients	Male	-			No effect
						Female
Spindler	2015	EDTA (1 mL)	QIAsymphony Virus/bacteria Midi Kit (QIAGEN)	qPCR	223 metastatic colorectal cancer patients	Male (n = 126)	15400 (800-1203100) alleles/mL			No effect (P = 0.1)
						Female (n = 97)	25000 (1000-4618400) alleles/mL
Chen	2016	EDTA (1 mL)	QIAamp Circulating Nucleic Acid Kit (QIAGEN)	Qubit	Stage I and II non-small cell lung cancer patients	Male (n = 33)	4.29 ± 8.47 ng/mL			No effect (P = 0.318)
						Female (n = 25)	9.6 ± 13.42 ng/mL
Hsieh	2016	DNS	QIAamp DNA Tissue Kit and Minelute Virus Kit (QIAGEN)	qPCR	81 esophageal squamous cell carcinoma patients		Low cirDNA (av: 5918 ± 3488 copies/mL; n = 40)		High cirDNA (av: 53,311 ± 37,524 copies/mL; n = 41)	No effect (P = 0.315)
						Male (n = 70)	N = 33		N = 37
						Female (n = 11)	N = 7		N = 4
Karlas	2017	EDTA (0.2 mL)	QIAamp Blood DNA Mini Kit (QIAGEN)	qPCR	58 non-alcoholic fatty liver disease patients	Male (n = 32)	90 bp fragment		-	No effect except longer fragment of cirDNA is lower in male (P = 0.0051)
							222 bp fragment		2.4 ng/mL
						Female (n = 26)	90 bp fragment		-
							222 bp fragment		-
Li	2017	EDTA	MagMAX Cell-Free DNA Isolation Kit (Applied Biosystems)	Qubit dsDNA HS Assay Kit	174 all lymphoma patients	Male (n = 107)	660 (290-1684) ng/mL			No effect (P = 0.769)
						Female (n = 67)	702 (284-2000) ng/mL
					98 diffuse large B cell lymphoma cancer	Male (n = 61)	764 (352-1868.5) ng/mL			No effect (P = 0.507)
						Female (n = 37)	1118 (295-3080) ng/mL
Cayir	2018	EDTA	Direct from plasma	Qubit	51 controls	Male (n = 28)	707 ± 252 ng/mL			Significantly higher in male
						Female (n = 23)	586 ± 586 ng/mL
					72 greenhouse workers	Male (n = 41)	1,129 ± 298.6 ng/mL			Significantly higher in male
						Female (n = 31)	1,062 ± 384 ng/mL
Meddeb	2019	EDTA (0.2-1 mL)	QIAamp Blood Mini Kit (QIAGEN)	RT-CPR	104 healthy individuals	Male (n = 62)	1.69 x 103 copies/mL			Significantly higher in male (P = 0.048)
						Female (n = 42)	1.48 x 103 copies/mL
					118 colorectal cancer	Male (n = 68)	4.65 x 103 copies/mL			No effect
						Female (n = 50)	5.40 x 103 copies/mL
Van der Drift	2010	EDTA (1 mL)	MagNA Pure LC Total Nucleic Acid Isolation Kit-Large Volume (Roche)	qPCR	21 healthy controls	Male (n = 19)	29 ng/mL			No effect
						Female (n = 2)	36 ng/mL
					46 lung cancer patients	Male (n = 30)	53 ng/mL
						Female (n = 16)	48 ng/mL
Catarino	2012	EDTA	QIAamp DNA Mini Kit (QIAGEN)	qPCR	205 healthy controls	Male (n = 78)	P = <0.001			Significantly higher in male
						Female (n = 127)
					104 lung cancer patients	Male (n = 86)	P = 0.123			No effect
						Female (n = 20)
Wu	2019	EDTA (200 µL)	QIAamp DNA blood Mini Kits (QIAGEN)	qPCR	60 newly diagnosed lymphoma patients	Male (n = 32)	P = 0.76			No effect
						Female (n = 28)
					107 treated lymphoma patients	Male (n = 59)	P = 0.4967
						Female (n = 48)
Alghofaili	2019	EDTA (1 mL)	QIAamp Circulating Nucleic Acid Kit (QIAGEN)	Qubit	275 healthy volunteers	Male (n = 124)	P = 0.000103			Significantly higher in male
						Female (n = 151)
Caglar	2020	EDTA	Direct from plasma	Qubit	Thyroiditis (n = 33)	Male vs female	p > 0.7			No effect
					Benign (n = 37)		P = 0.054			No effect
					Malignant (n = 30)		-			No effect
					All thyroid patients (n = 100)		P = 0.08			No effect
Bryk	2019	DNS	DNS	Assay kit (Invitrogen)	111 T2D patients	Male vs female in T2D patients	Low cirDNA (<2.84 ug/mL) (n = 83)		P = 0.51	No effect
							High cirDNA (≥2.84 ug/mL) (n = 28)
Bu	2020	EDTA (200 µL)	QIAamp DNA Mini Kit (QIAGEN)	Bioanalyser	61 gastric cancer patients	Male (n = 41) vs Female (n = 20)	P = 0.624			No effect
			Beads (self-protocol)				P = 0.918
DNS: Did not specify
T2D: Type II Diabetes

## Sheet: 1.7. Age
First author	Year	Blood tube type (plasma volume extracted)	Extraction kit	Quantification method	Participants		Age	Quantification		Conclusion on cirDNA amount
Sozzi	2001	Lithium-heparin	Direct from plasma	DNA DipStick TM Kit	43 controls		-			No effect
					84 lung cancer patients		39-59 (n = 31)	305 ng/mL
							60-69 (n = 34)	261 ng/mL
							≥70 (n = 19)	441 ng/mL
Sozzi	2003	EDTA (1 mL)	QIAamp DNA Mini kit (QIAGEN)	qPCR	100 lung cancer patients. Mean age: 65.1 ± 8.9		≤60	-		Significantly higher with increasing age
							61-71
							≥72
Tamkovich	2004	EDTA (1 mL)	In-house method from Tamkovich et al (2004)*	SYBR Green II dye	35 healthy participants (15 M + 20 F)		18-53	-		No effect
Zhong	2007	EDTA (400 µL)	MagNA Pure LC DNA Isolation Kit-Large Volume (Roche)	qPCR	Healthy adults		20-40	977 copies/mL		Significantly cirDNA higher in female >60 years old (P < 0.05). No effect in men
							41-60	1,119 copies/mL
							>60	1,321 copies/mL
Lee	2011	EDTA (200 µL)	QIAamp DNA Blood Mini Kit (QIAGEN)	qPCR	134 lung cancer patients		≤65 (n = 108)	4.87 (1.10) ng/mL		No effect (P = 0.333)
							>65 (n = 26)	5.09 (0.96) ng/mL
Beiter	2011	EDTA (400 µL)	QIAamp Blood Mini Kit (QIAGEN)	qPCR	53 recreational runners		Mean age: 34.8. Range: 17-60 years	-		No effect
Jylhava	2011	EDTA (450 µL)	Phenol-chloroform	Qubit	11 Controls (females, age 22-37 yo)			1.039 ± 0.260 ug/mL		Significantly higher in elderly (P = 0.035)
					12 Nonagenarians (females, born 1917)			1.338 ± 0.363 ug/mL
		EDTA	NucleoSpin Plasma XS Kit (MACHEREY-NAGEL)	qPCR	11 Controls (females, age 22-37 yo)			3.435 ± 0.246 logGE/mL		Significantly higher in elderly (P = <0.001)
					12 Nonagenarians (females, born 1917)			3.840 ± 0.224 logGE/mL
		EDTA	Direct from plasma	Qubit	11 Controls (females, age 22-37 yo)			0.520 ± 0.06 µg/mL		Significantly higher in elderly (P = 0.015)
					12 Nonagenarians (females, born 1917)			0.606 ± 0.091 µg/mL
Jylhava	2013	EDTA	Direct from plasma	Qubit	30 Young controls (9 M + 21 F, aged 19 - 30 yo)			0.820 (0.662-0.901) µg/mL		Significantly higher in nonagenarian group (P = 0.002)
					144 Nonagenarians (43 M + 101 F, aged ≥90 yo)			0.884 (0.788-986) µg/mL
Kim	2014	DNS (1.5 mL)	QIAamp DNA Micro kit (QIAGEN)	qPCR	34 controls (mean age = 63.79 ± 6.76 years)		<65	78.90 ± 8.55 ng/mL		No effect
							≥65	78.78 ± 7.17 ng/mL
					30 gastric cancer patients (mean age = 66.72 ± 13.16 years)		<65	102.31 ± 12.59 ng/mL		Significantly higher with increasing age
							≥65	119.71 ± 8.28 ng/mL
Spindler	2014	EDTA (1 mL)	QIAsymphony virus/bacteria Midi Kit (QIAGEN)	qPCR	86 metastatic colorectal cancer patients (median age: 66 (37-83))		<66 (n = 43)	7,300 (1,400-1,200,000) alleles/mL		No effect
							>66 (n = 43)	5,400 (1,700-200,000) alleles/mL
Jylhava	2014	DNS	DNS	Qubit	Women (n = 366-409, mean age 60.48 (8.98))			r = 0.152. P = 0.002		Significantly higher with increasing age.
					Women (Estrogen HRT user, n = 131-148, mean age 58.57 (6.88))			r = 0.071. P = 0.391		No effect
					Women (Estrogen + Progestin HRT user, n = 87-98, mean age 57.23 (6.39))			r = 0.017. P = 0.869		No effect
					Men (n = 609-681, mean age (58.31 (7.91))			r = -0.014. P = 0712		No effect
Breitbach#	2014	EDTA (0.055 µL)	Direct from plasma	qPCR	26 male athletes (13 handball players + 13 triathletes). Mean age 24.7 (3.1)			-		No effect
Jeong	2015	DNS (1 mL)	QIAamp Circulating Nucleic Acid Kit (QIAGEN)	qPCR	Haemodialysis patients (n = 95)		58 ± 1.5	-		No effect
					Diabetic haemodialysis patients (n = 50/95)		66.4 ± 1.8	P = 0.93		No effect
Spindler	2015	EDTA (1 mL)	QIAsymphony Virus/bacteria Midi Kit (QIAGEN)	qPCR	Metastatic colorectal cancer patients (n = 223). Median age: 63 (35-82) yo.		≤63 (n = 119)	14900 (1000-2259600) alleles/mL		No effect (P = 0.39)
							>63 (n = 104)	21000 (800-4618400) alleles/mL
Korzeneva	2015	Heparin (1 mL)	Non-kit protocol. Refer to paper for description.	RiboGreen dye (Invitrogen)	Average age for all groups: 48.5 ± 16.3 years
					109 never exposed control group		~21-86	P = 0.13		No effect
					88 chronic gamma-neutron radiation exposed group		~26-79	P = 0.6		No effect
					88 chronic tritium β-radiation exposed group		~20-80	P = 0.06		No effect
					109 never exposed control group		<65	-		Significantly higher with increasing age
							≥65
					88 chronic gamma-neutron radiation exposed group		<65	-		Significantly lower with increasing age
							≥65
					88 chronic tritium β-radiation exposed group		<65	-		No effect
							≥65
Hsieh	2016	DNS	QIAamp DNA Tissue Kit and Minelute Virus Kit (QIAGEN)	qPCR	81 esophageal squamous cell carcinoma patients (70 M + 11 F)			Low cirDNA (av: 5918 ± 3488 copies/mL; n = 40)	High cirDNA (av: 53,311 ± 37,524 copies/mL; n = 41)	No effect (P = 0.588)
							<60 (n = 43)	n = 20	n = 23
							>60 (n = 38)	n = 20	n = 18
Tosevska	2016	EDTA	Direct from plasma	QuantiFluor dsDNA System	105 Institutionalised elderly		65-98	-		No effect
Karlas	2017	EDTA (0.2 mL)	QIAamp Blood DNA Mini Kit (QIAGEN)	qPCR	58 non-alcoholic fatty liver disease patients		62.1 ± 11	-		No effect
Li	2017	EDTA	MagMAX Cell-Free DNA Isolation Kit (Applied Biosystems)	Qubit dsDNA HS Assay Kit	174 Lymphoma patients		≤60 (n = 117)	702 (260-1868.5) ng/mL		No effect (P = 0.414)
							≥60 (n = 57)	656 (355-1847) ng/mL
					98 Diffuse large B cell lymphoma		≤60 (n = 61)	802 (287-2430) ng/mL		No effect (P = 0.668)
							≥60 (n = 37)	888 (384-2220) ng/mL
Beranek	2017	EDTA (750 µL)	NucleoSpin Plasma XS Kit (MACHEREY-NAGEL)	GB Genetic Human DNA Assay	28 exacerbated psoriasis vulgaris patients (15 M + 13 F)		50 (18-69)	-		No effect
Teo	2019	DNS (3-4 mL)	QIAamp Circulating Nucleic Acid Kit (QIAGEN)	Qubit	3 young individuals (age 25 ± 0.5)			-		No effect
					3 elderly individuals (age 71 ± 1.6)
					6 centenarians (age 101.8 ± 1.1)	Healthy (n = 3)
						Unhealthy (n = 3)
Meddeb	2019	EDTA (0.2-1 mL)	QIAamp Blood Mini Kit (QIAGEN)	RT-CPR	Healthy individuals (n = 104). Age range: 18-69		<47 (n = 52)	1.36 x 103 copies/mL		Significantly higher with increasing age (P = 0.009)
							≥47 (n = 52)	1.73 x 103 copies/mL
					Healthy individuals (n = 104). Cut-off age: 56 yo^		Young (n = 79)	-		Significantly higher with increasing age (P = 0.0026)
							Older (n = 25)
					Colorectal cancer (n = 118). Age range: 22-91		<65 (n = 52)	4.73 x 103 copies/mL		No effect
							≥65 (n = 66)	4.94 x 103 copies/mL
					Colorectal cancer (n = 118). Cut-off age: 56 yo^		Young (n = 25)	P = 0.913		No effect
							Older (n = 93)
Van der Drift	2010	EDTA (1 mL)	MagNA Pure LC Total Nucleic Acid Isolation Kit-Large Volume (Roche)	qPCR	Healthy controls		<60	P = 0.43		No effect
							≥60
					Lung cancer		<60	P = 0.25
							≥60
Catarino	2012	EDTA	QIAamp DNA Mini Kit (QIAGEN)	qPCR	205 healthy controls		<64	P = 0.342		No effect
							≥64
					104 lung cancer patients		<64	P = 0.614
							≥64
Wu	2019	EDTA (200 µL)	QIAamp DNA blood Mini Kit (QIAGEN)	qPCR	60 newly diagnosed lymphoma patients		<60	P = 0.4041		No effect
							≥60
					107 treated lymphoma patients		<60	P = 0.3127
							≥60
Alghofaili	2019	EDTA (1 mL)	QIAamp Circulating Nucleic Acid Kit (QIAGEN)	Qubit	275 healthy volunteers		27 (0 - 57 yo)	r = -0.09		No effect
Caglar	2020	EDTA	Direct from plasma	Qubit	Thyroiditis (n = 33)		37.6 ± 10.9	-		No effect
					Benign (n = 37)		54.1 ± 13.1	-		No effect
					Malignant thyroid (n = 30)		47.8 ± 11.9	-		No effect
					All thyroid patients (n = 100)			P <0.05		Significant positive correlation with age
Bryk	2019	DNS	DNS	Assay kit (Invitrogen)	Low cirDNA (<2.84 ug/mL) (n = 83)		Former or current smokers vs non-smoking in T2D patients	P = 0.63		No effect
					High cirDNA (≥2.84 ug/mL) (n = 28)
Bu	2020	EDTA (200 µL)	QIAamp DNA Mini Kit (QIAGEN)	Bioanalyser	61 gastric cancer patients		40-83	p = 0.323		No effect
			Beads (self-protocol)					P = 0.280
logGE: log genome equivalent
T2D: Type II diabetes
yo: years old
M: Male
F: Female
^Using same cut off for both healthy and cancer cohort as the median age (56) of all individuals tested.
# Breitbach, S., Sterzing, B., Magallanes, C., Tug, S., & Simon, P. (2014). Direct measurement of cell-free DNA from serially collected capillary plasma during incremental exercise. J Appl Physiol, 117.
*Tamkovich, S. N., Laktionov, P. P., Rykova, E. Y., & Vlassov, V. V. (2004). Simple and rapid procedure suitable for quantitative isolation of low and high molecular weight extracellular nucleic acids. Nucleosides, nucleotides & nucleic acids, 23(6-7), 873–877. https://doi.org/10.1081/NCN-200026034

## Sheet: 2.1.1 Acute exercise
First author (year)	Blood tube type (plasma volume extracted)	Extraction kit	Quantification method	Setting	Participants	Time point				Quantification		Conclusion on cirDNA amount
Atamaniuk (2004)	EDTA (800 µL)	DNA Isolation Reagent set (Roche)	Vista-green staining then fluorescence measured by qPCR machine	Race (about 21 km, 2 hours half marathon)	25 healthy half-marathon runners (12 M + 13 F)	Before the race				18.01 pg/uL		· Significant increase after race
						Immediately after race				334.4 pg/uL		· Significant decrease 2 h after race
						2 h post-race				30.44 pg/uL
Margeli (2005)	DNS (400 µL)	QIAamp DNA Blood Mini Kit (QIAGEN)	qPCR	246 km µLtra-marathon	15 healthy males	Pre				14.8 ± 13.9 GE/mL		· Significant increase after race
						End (within 15 min)				146.2 ± 161.5 GE/mL		· Remain increased after 48 h
						Post (48 h after race)				51.5 ± 73.2 GE/mL
Atamaniuk (2008)	EDTA (800 µL)	DNA Reagent set (Roche)	Vista-green staining then fluorescence measured by qPCR machine	6-hour race	14 experienced µLtra-marathon runners (9 M + 5 F)	Pre				-		· Significant increase after the race
						Post				162.5 pg/uL ± 201.4		· Remained elevated after 2 h
						2 h post				30.9 pg/uL ± 171.4		· Returned to normal after 24 h
						24 h post				9 pg/uL ± 5.6
Fatouros (2010)	DNS (400 µL)	QIAamp DNA Blood Mini Kit (QIAGEN)	qPCR	Control (rest): remain seated/lying in the lab. Exercise: 45 minutes treadmill run followed by increase in speed until exhaustion	11 moderately trained men					Control (resting)	Exercise	· Control remains unchanged
						Pre				~150-200 GE/mL	~200 GE/mL	· Significant increase after exercise
						Post					~3250 GE/mL	· Remain elevated after 0.5 h
						0.5 h					~2700 GE/mL	· Returned to normal in 1 h
						1 h					~200 GE/mL
						2 h					~175-230 GE/mL
						3 h
						4 h
						5 h
						6 h
						8 h
						10 h
						24 h				~100 GE/mL
Atamaniuk (2010)	Lithium-heparin (800 µL)	DNA Isolation kit (Roche)	Vista-green staining then fluorescence measured by qPCR machine	6 sets of 6 weightlifting exercise	12 male competitive weightlifters	T1 (Before)				12.95 ± 4.42 pg/uL		· Increased after exercise
						T2 (immediately after)				40.77 ± 31.94 pg/uL		· Significantly decreased after 2 h
						T3 (2 h after exercise)				11.38 ± 4.18 pg/uL
Beiter (2011)	EDTA (400 µL)	QIAamp Blood Mini Kit (QIAGEN)	qPCR	Public 10 km cross country interval run	53 recreational runners (34 M + 19 F)	Before				2.3 x 106 GE/L		· Significantly increased after exercise
						Immediately after				17.4 x 106 (9.9-212 x 106) GE/L
				Incremental test on treadmill (until exhaustion)	9 well trained male athletes	Before				1.8 (1.3-2.6) x 106 GE/L		· Increased significantly after exercise
						Immediately after				25.3 (18-36) x 106 GE/L		· Decreased significantly after 30 min but still significantly higher than pre-exercise
						30 min after				7.6 (5.3-11) x 106 GE/L
				Strenuous treadmill until exhaustion	1 well-trained endurance male athlete, 1 moderately trained female participant, 1 well-trained recreational male runner	0				Varies depending on the individual. cirDNA values were not averaged but individually plotted.		-
						3 min (mid exercise)
						6 min (mid exercise)
						9 min (mid exercise)
						12 min (mid exercise)
						15 min (mid exercise)
						+5 min (after exercise)
						+10 min (after exercise)
						+15 min (after exercise)
						+20 min (after exercise)
						+30 min (after exercise)
De Sousa (2012)	DNS (200 µL)	QIAsymphony DNA Mini Kit (QIAGEN)	qPCR	Overload training program (day 1-8) then 10 x 800 m sprints on day 9.	24 highly competitive male endurance runners	Placebo drink (n = 12)	Day 1 (-9 days)			<7500 alleles/mL		· Significantly increased after running
							Day 9 (-140 min)			<7500 alleles/mL		· Return to normal by 80 min post-exercise.
							Post running			73,751.8 ± 11,546.6 alleles/mL		· After running the cirDNA in carbohydrate group is significantly lower than the placebo group.
							80 min after			<7500 alleles/mL
						Carbohydrate drink (n = 12)	Day 1 (-9 days)			<7500 alleles/mL
							Day 9 (-140 min)			<7500 alleles/mL
							Post running			48,240 ± 5,431.8 alleles/mL
							80 min after			<7500 alleles/mL
Breitbach (2014)#	EDTA (0.055 µL)	Direct from plasma	qPCR	Treadmill until exhaustion (average 17.9 min)	26 male athletes (13 handball players + 13 triathletes)	Capillary blood	Before			8.7 ng/mL		Significant increase after exercise
							After			68.3 ng/mL
						Venous blood	Before			17.6 ng/mL		Significant increase after exercise
							After			153.2 ng/mL
Beiter (2014)	EDTA (400 µL)	QIAamp Blood Mini Kit (QIAGEN)	qPCR	Increment treadmill until exhaustion	6 well-trained male athletes	Before				1,645 GE/mL		· Significant increase after exercise
						After (immediately)				25,511 GE/mL		· Decreased after 30 minutes but still significantly higher than baseline
						After 30 minutes				7,718 GE/mL
				High intensity 60 minutes cycling	6 untrained males	Before				1,582 GE/mL		· Significant increase after exercise
						After (immediately)				10,934 GE/mL		· Return to normal after 3 h
						After 3 h				2,131 GE/mL		· No differences between groups
					6 regularly endurance trained males	Before				2,078 GE/mL
						After (immediately)				9,425 GE/mL
						After 3 h				2,948 GE/mL
Breitbach (2014)*	EDTA	Direct from plasma	qPCR	10 km relay race	10 recreational runners (6 M + 4 F)	Before				22.09 ng/mL		· Significant increase after exercise
						After				162.4 ng/mL
	EDTA (100 µL)	QIAamp DNA Blood Mini Kit (QIAGEN)	qPCR			Before				7.75 ng/mL		· Significant increase after exercise
						After				65 ng/mL
Tug (2015)	EDTA (50 µL)	Phenol-chloroform method	qPCR	Incremental treadmill test	3 healthy male controls					Total cirDNA	Y-chrom cirDNA	Increase after exercise and return to normal after exercise. Authors did not state any conclusion regarding significance.
						Before exercise				~25 ng/mL	~25 ng/mL
						After exercise				~100 ng/mL	~100 ng/mL
						After 90 min				~17.5 ng/mL	~17.5 ng/mL
					3 healthy female controls					Total cirDNA	Y-chrom cirDNA	Increase after exercise and return to normal after exercise. Authors did not state any conclusion regarding significance.
						Before exercise				~7.5 ng/mL	<0.1 ng/mL
						After exercise				~80 ng/mL
						After 90 min				~7.5 ng/mL
					Sex-mismatched haematopoietic stem cell transplantation patients (5 females with male donors					Total cirDNA	Y-chrom cirDNA
						Before exercise				77.6 ng/mL	30.8 ng/mL	Increase but not significant
						After exercise				140 ng/mL	70.8 ng/mL
						After 90 min				75.7 ng/mL	33.5 ng/mL
					Sex-mismatched haematopoietic stem cell transplantation patients (2 males with female donors)					Total cirDNA	Y-chrom cirDNA	Increase but not significant
						Before exercise				76 ng/mL	7.9 ng/mL
						After exercise				179.7 ng/mL	9.4 ng/mL
						After 90 min				73 ng/mL	7.2 ng/mL
Helmig (2015)	EDTA	QIAamp Circulating Nucleic Acid Kit (QIAGEN)	qPCR	Incremental treadmill test until exhaustion	5 physically active men	Before				24 ng/mL		· Significant increase immediately after exercise
						Immediately after				190.4 ng/mL		· Return to normal after 90 min.
						After 10 min				166.3 ng/mL
						After 30 min				60.4 ng/mL
						After 90 min				16.9 ng/mL
Fruhbeis (2015)	EDTA (700 µL)	QIAamp Circulating Nucleic Acid Kit (QIAGEN)	qPCR	Increment cycling test until exhaustion	1 physically active male (more than 3 h/week) tested twice	Before				~10 ng/mL		cirDNA increased after 15 min and reached maximum at 10 min after exercise stops. Authors did not report on significance.
						3 min during exercise				~9 ng/mL
						6 min during exercise				~8 ng/mL
						9 min during exercise				~12 ng/mL
						12 min during exercise				~13 ng/mL
						15 min during exercise				~18 ng/mL
						18 min during exercise				~22 ng/mL
						21 min during exercise				~33 ng/mL
						Immediately after				~40 ng/mL
						10 min after exercise				~56 ng/mL
						30 min after exercise				~28 ng/mL
						90 min after exercise				~10 ng/mL
Tug (2017)^	EDTA	Direct from plasma	qPCR	Acute strength exercise (involving whole body exercises, deadlifts, squats and muscle targeted exercises)	16 regular strength trained men	12th exercise				P = 0.002		Significant increase from 12th exercise onwards to the last (16th) exercise
						13th exercise				P < 0.001
						14th exercise				P = 0.005
						15th exercise				P < 0.001
						16th exercise				P < 0.001
				High intensity training (HT)	5/16	Before first exercise				12.23 ng/mL		Significantly higher cirDNA in HT > DT > CT
						After last exercise				17.73 ng/mL
				Differential training (DT)	5/16	Before first exercise				6.79 ng/mL
						After last exercise				10.05 ng/mL
				Conservation training (CT)	6/16	Before first exercise				7.32 ng/mL
						After last exercise				12.7 ng/mL
Tug (2017)ǂ	EDTA	Direct from plasma	qPCR	Incremental bicycle exercise until exhaustion	11 competitive male cyclists	Short fragment (90 bp)		Before		4.44-fold (P < 0.001)		Significant increase after exercise then return to normal after 90 min
								After
								After 90 min		-
						Long fragment (222 bp)		Before		7.82-fold (P < 0.001)		Significant increase after exercise then return to normal after 90 min
								After
								After 90 min		-
	EDTA (400 µL)	QIAamp DNA Blood Mini Kit (QIAGEN)	qPCR			Short fragment (70 bp)		Before		5.01-fold (P < 0.001)		Significant increase after exercise then return to normal after 90 min
								After
								After 90 minutes
						Long fragment (323 bp)		Before		2.38-fold (P = 0.231)		No effect
								After
								After 90 min		-
Stawski (2017)	EDTA (400 µL)	QIAamp DNA Blood Mini Kit (QIAGEN)	qPCR	Treadmill until exhaustion	11 averaged-trained men	1st bout (8.6 ± 5.5 km; 47 ± 31 min)
						Before				3.4 ± 1.4 ng/mL		Significant increase after exercise
						After				38.5 ± 27.5 ng/mL
						2nd bout (10.7 ± 7.6 km; 57 ± 41 min)
						Before				4.1 ± 3.3 ng/mL		Significant increase after exercise
						After				48.5 ± 26.2 ng/mL
						3rd bout (10.4 ± 7.2 km; 56 ± 40 min)
						Before				3.1 ± 1.6 ng/mL		Significant increase after exercise
						After				53.8 ± 39.9 ng/mL
Haller (2017)	DNS	Direct from plasma	qPCR	Stepwise increment running test until exhaustion	14 athletes (7 M + 7 F)					Mean (ng/mL)	Median (ng/mL)	Significant increase after exercise and decrease during 30 min recovery
						Before				5.38 ± 2.9	~4.5
						3 min in exercise					~7
						6 min in exercise					~7
						9 min in exercise					~9.5
						12 min in exercise					~11
						15 min in exercise					~18.8
						18 min in exercise					~26.5
						21 min in exercise					~30.5
						15 min after exercise				38 ± 25.5	~27
						30 min after exercise					~16
				40 min endurance run at 9.6 km/h	13 athletes (7 M + 6 F)	Before				5.91 ± 2.2 ng/mL		Steady increase during run and decrease after running
						After				39.9 ± 25.9 ng/mL
Hummel (2018)	EDTA (0.9 mL)	QIAamp Circulating Nucleic Acid Kit (QIAGEN)	qPCR	Treadmill until exhaustion	20 male students of sports science	Before (-2 min)				~1x104 copies/mL		· Increase and peaks at 15 min
						After (+2 min)				~4x104 copies/mL		· Return nearly to baseline
						After (+15 min)				~5x104 copies/mL
						After (+30 min)				~2.6x104 copies/mL
						After (+40 min)				~2x104 copies/mL
Haller (2018)	EDTA	Direct from plasma	qPCR	5 x 40 m sprints (5.94 ± 0.50 seconds)	9 healthy subjects (7 M + 2 F)	Sprint session with 1-minute break						· Significant increase after baseline
						Baseline				~6.3 ng/mL		· cirDNA increase more during short break than long break
						Capillary		Pre		~15 ng/mL
								Post		~16 ng/mL
						Venous		Pre		~25 ng/mL
								Post		~68 ng/mL
						Sprint session with 5-minute break
						Capillary		Pre		~8.7 ng/mL
								Post		~14 ng/mL
						Venous		Pre		~22 ng/mL
								Post		~40 ng/mL
				Treadmill test	10 male football players playing more than 70 min in game and participated in treadmill test	Before				21.9 (8.7) ng/mL		Significant increase after exercise
						After				143.4 ng/mL
				Season football game		Before				23.1 ng/mL		Significant increase after exercise
						After				396.5 ng/mL
Ferrandi (2018)	EDTA (200 µL)	QIAamp DNA Blood Mini Kit (QIAGEN)	qPCR	HIIE (high-intensity interval exercise; 30 min)	14 healthy male subjects (7 normal weight and 7 obese)	Normal weight		Before		~4 pg/uL		· Significant increase immediately after HIIE
								After		~8 pg/uL		· No difference between obese and normal
								After 1 h		~12 pg/uL
						Obese		Before		~6 pg/uL
								After		~8 pg/uL
								After 1 h		~8 pg/uL
Ohlsson (2020)	EDTA (200 µL)	QIAamp 96 DNA Blood Kit (QIAGEN)	qPCR	Cycling until maximal heart rate	8 healthy volunteers (4 M and 4 F)	Before				28.22 copies/L x 106		Significant increase at Post-30 and Post-90 (after exercise)
						Post-sub				15.8 copies/L x 106
						Post-max				46.1 copies/L x 106
						Post-30 min				49.6 copies/L x 106
						Post-90 min				39 copies/L x 106
Mavropalias (2020)	EDTA (2-5 mL)	QIAamp Circulating Nucleic Acid Kit (QIAGEN)	ddPCR	Eccentric cycling (high and low intensity)	20 men (11 high intensity, 9 low intensity, randomly allocated)	Low intensity (LI)			Pre	203 copies/mL plasma		Significant increase from pre- to post-exercise. Return to baseline by 24 h. HI is significantly increased than LI at post-exercise
									Post	~200 copies/mL plasma
									24	~200 copies/mL plasma
									48	~200 copies/mL plasma
									72	~200 copies/mL plasma
						High intensity (HI)			Pre	233 copies/mL plasma
									Post	~500 copies/mL plasma
									24	~200 copies/mL plasma
									48	~200 copies/mL plasma
									72	~200 copies/mL plasma
ddPCR: droplet digital polymerase chain reaction
DNS: Did not specify
GE: Genome equivalent
h: hours
min: minutes
M: male
F: female
~ extrapolated from graph
# Breitbach, S., Sterzing, B., Magallanes, C., Tug, S., & Simon, P. (2014). Direct measurement of cell-free DNA from serially collected capillary plasma during incremental exercise. J Appl Physiol, 117.
* Breitbach, S., Tug, S., Helmig, S., Zahn, D., Kubiak, T., Michal, M., . . . Simon, P. (2014). Direct quantification of cell-free, circulating DNA from unpurified plasma. PLOS ONE, 9.
^ Tug, S., Tross, A., Hegen, P., Neuberger, E. W. I., Helmig, S., Schöllhorn, W., & Simon, P. (2017). Acute effects of strength exercises and effects of regular strength training on cell free DNA concentrations in blood plasma. PLOS ONE, 12(9), e0184668.
ǂ Tug, S., Mehdorn, M., Helmig, S., Breitbach, S., Ehlert, T., & Simon, P. (2017). Exploring the Potential of Cell-Free-DNA Measurements After an Exhaustive Cycle-Ergometer Test as a Marker for Performance-Related Parameters. Int J Sports Physiol Perform, 12 5, 597-604.

## Sheet: 2.1.2. Chronic exercise
First author (year)	Blood tube type (plasma volume extracted)	Extraction kit	Quantification method	Setting	Participants	Time point		Quantification	Conclusion on cirDNA amount
Fatouros (2006)	DNS (400 µL)	QIAamp DNA Blood Mini Kit (QIAGEN)	qPCR	4 of 3 weeks training blocks (doing 8 resistance multi-joint exercises), separated by 5 days apart between each training blocks	17 recreationally trained men	Baseline (no exercise for 8 weeks)		31.4 GenEq/mL	Significant difference between:
									T0 vs T1, T2, T3 (↑)
						T1 (low-volume training)		143.5 GenEq/mL	T1 vs T2, T3 (↑)
						T2 (high-volume training)		289.9 GenEq/mL	T2 vs T3 (↑)
						T3 (very high-volume training)		605.7 GenEq/mL	T2 vs T4 (↓)
						T4 (low-volume training)		74.8 GenEq/mL	T3 vs T4 (↓)
De Sousa (2012)	DNS (200 µL)	QIAsymphony DNA Mini Kit (QIAGEN)	qPCR	Overload training program of intense and continuous running (day 1-8)	24 highly competitive male endurance runners	Placebo drink (n = 12)	Day 1	<7500 alleles/mL	No effect
							Day 9	<7500 alleles/mL
						Carbohydrate drink (n = 12)	Day 1	<7500 alleles/mL
							Day 9	<7500 alleles/mL
Gentles (2015)	DNS	NucleoSpin Plasma XS Kit (MACHEREY-NAGEL)	Quant-iT PicoGreen dsDNA kit	Soccer (15 weeks)	23 NCAA Division I male soccer players	Group I (started games in autumn season; n= 13)	T1 (Pre-season; 10 Aug)	5.1 (2.9-7.2) ng/mL	· Significantly increased during mid-season
							T2 (Mid-season; 12 Sept)	9.1 (6.6-11.6) ng/mL	· Remain significantly elevated than pre-season
							T3 (Post season; 13 Nov)	8.7 (5.9-11.5) ng/mL
						Group II (did not start games in autumn season; n = 10)	T1 (Pre-season; 10 Aug)	3.8 (2.5-5) ng/mL	No effect
							T2 (Mid-season; 12 Sept)	5.5 (3.3-7.7) ng/mL
							T3 (Post season; 13 Nov)	8.9 (2.7-15.3) ng/mL
Tosevska (2016)	EDTA	Direct from plasma	QuantiFluor dsDNA System	Variety of resistance training	Institutionalised elderly aged 65-98
					Control group undergoing cognitive intervention only (CT group; n = 23)	Before		-	No change
						After 6 months		-
					Resistance training (RT; n = 27)	Before		-	No change
						After 6 months		-
					Resistance training with supplementation (RTS; n = 20)	Before		P = 0.008	Significant decrease in cirDNA levels in RTS group.
						After 6 months
Tug (2017)	EDTA	Direct from plasma	qPCR	Variety of strength exercise (involving whole body exercises, deadlifts, squats and muscle targeted exercises)	16 regular strength trained men	Day 1		8.31 ± 2.84 ng/mL	Significant increase in the following days after, peaking at day 2.
						Day 2		28.82 ± 32.906 ng/mL
								P <0.001 – higher than day 1
								P = 0.02 – higher than day 5
						Day 5		P = 0.002 higher than day 1
						Day 8
						Day 12
Gentles (2017)	DNS	NucleoSpin Plasma XS Kit (MACHEREY-NAGEL)	Quant-iT PicoGreen dsDNA kit	20-week resistance training	8 weightlifters (5 M + 3 F)	T1 (baseline)		7.5 ng/mL	No effect
						T2		7.4 ng/mL
						T3		8.1 ng/mL
						T4		7.0 ng/mL
						T5		9.2 ng/mL
						T6		6.7 ng/mL
DNS: Did not specify
M: Males
F: Females

## Sheet: 2.2. Alcohol
First author	Year	Blood tube type (plasma volume extracted)	Extraction kit	Quantification method	Participants	Alcohol intake	Quantification		Conclusion on cirDNA amount
Kim	2014	DNS (1.5 mL)	QIAamp DNA Micro kit (QIAGEN)	qPCR	Healthy control (n = 24)	None (n = 15)	76.06 ± 11.45 ng/mL		No effect
						Mild to moderate (n = 7)	75.30 ± 12.84 ng/mL
						Severe (n = 2)	84.22 ± 18.71 ng/mL
					Gastric cancer patients (n = 23)	None (n = 13)	117.00 ± 12.55 ng/mL
						Mild to moderate (n = 2)	108.50 ± 14.84 ng/mL
						Severe (n = 8)	105.12 ± 13.55 ng/mL
Hsieh	2016	DNS	QIAamp DNA Tissue Kit and Minelute Virus Kit (QIAGEN)	qPCR	81 esophageal squamous cell carcinoma patients (70 M + 11 F)		Low cirDNA (av: 5918 ± 3488 copies/mL; n = 40)	High cirDNA (av: 53,311 ± 37,524 copies/mL; n = 41)	No effect
						Never (n = 26)	N = 24	N = 19
						Yes (n = 17)	N = 16	N = 22
DNS: Did not specify
M: Male
F: Female

[truncated: 3 more sheets: 2.3. Occupational hazard, 2.4. Smoking, 3. Miscellaneous]
